# Supplementary material for: One-step preparation of eggplant-derived hierarchical porous graphitic biochar as efficient oxygen reduction catalyst in microbial fuel cells
Source: Royal Society of Chemistry journal article supplement (doi:10.1039/d0ra09976g), 2021-01-01
Supplement: d0ra09976g1.pdf [file d0ra09976g1.pdf]

## **One-step preparation of eggplant-derived hierarchical porous graphitic biochar as efficient oxygen reduction catalyst in microbial fuel cells**

Zhengtai Zha<sup>a,b</sup>, Zhi Zhang<sup>a,b,\*</sup>, Ping Xiang<sup>a,b</sup>, Hongyi Zhu<sup>a,b</sup>, Bangmei Zhou<sup>a,b</sup>, Zhulong Sun<sup>a,b</sup>, Shun Zhou<sup>a,b</sup>

<sup>a</sup> College of Environment and Ecology, Chongqing University, Chongqing, 400045, China

<sup>b</sup> Key Laboratory of Three Gorges Reservoir Region's Eco-Environment, Ministry of Education, Chongqing University, Chongqing, 400045, China

---

\*Corresponding author. E-mail address: zhangzhicqu@cqu.edu.cn (Z. Zhang).

**Text S1.** Conversion of potential between Ag/AgCl electrode and reversible hydrogen electrode (RHE)

All the electrochemical measurements were performed with a three-electrode system in 50 mM PBS solution. The reference electrode Ag/AgCl was filled with 4 M KCl gel solution. The potentials could be converted to vs. a reversible hydrogen electrode (RHE) which is calculated from Eq. (S1).

$$E_{RHE} = E_{vs. Ag/AgCl} + 0.0591 * pH + 0.199 \quad (S1)$$

Where  $E_{RHE}$  would be the measured potential vs. a reversible hydrogen electrode,  $E_{vs. Ag/AgCl}$  is the experimentally tested potential vs. Ag/AgCl reference electrode. 0.199 V is the formal potential of an Ag/AgCl electrode with 4 M KCl filling solution at 25 °C vs. NHE according to the Phychemi Co., Ltd.

**Test. S2** Electrode preparation method

The anode material is carbon felt (2 × 2 cm), soaked in acetone overnight, then thoroughly washed with deionized water, and dried in an oven at 60°C for using. Cathode material was carbon cloth (project area: 7 cm<sup>2</sup>) including a gas diffusion layer, carbon-based layer, and catalyst layer (0.5 mg/cm<sup>2</sup>). The gas diffusion layer was fabricated by coating polytetrafluoroethylene (PTFE) solution (60 wt%, Hesen, Shanghai, China) on the carbon-based layer and annealing at 370 °C for 15 min in a muffle furnace; this process was repeated four times. The catalyst ink was prepared by sonicating a mixture comprising the catalyst (3.5 mg), nafion solution (25 μL),

isopropanol (15  $\mu\text{L}$ ), and deionized water (5  $\mu\text{L}$ ) for 20 min. The uniform catalyst ink was brushed on the carbon cloth and dried at 28  $^{\circ}\text{C}$  for 24h. In addition, Pt/C cathode (20 wt%, 0.5  $\text{mg}/\text{cm}^2$ ) was fabricated by the same operation process as a reference to probe the performance of the EPGC catalysts.

**Table S1** Nutrient solution formula used in MFCs.

| Phosphate buffer solution (g / L)                    |               | Trace metal solution (mg / L)                          |               | Vitamin solution (mg / L) |               |
|------------------------------------------------------|---------------|--------------------------------------------------------|---------------|---------------------------|---------------|
| Component                                            | Concentration | Component                                              | Concentration | Component                 | Concentration |
| NH <sub>4</sub> Cl                                   | 0.31          | Nitrilotriacetic acid                                  | 1.5           | Biotin                    | 2.0           |
| KCl                                                  | 0.13          | MgSO <sub>4</sub> ·7H <sub>2</sub> O                   | 3.0           | folic acid                | 2.0           |
| NaH <sub>2</sub> PO <sub>4</sub> ·2H <sub>2</sub> O  | 2.75          | MnSO <sub>4</sub> ·2H <sub>2</sub> O                   | 0.5           | pyridoxine HCl            | 10.0          |
| Na <sub>2</sub> HPO <sub>4</sub> ·12H <sub>2</sub> O | 11.466        | NaCl                                                   | 1.0           | riboflavin                | 5.0           |
|                                                      |               | FeSO <sub>4</sub> ·7H <sub>2</sub> O                   | 0.1           | thiamin                   | 5.0           |
|                                                      |               | CaCl <sub>2</sub> ·2H <sub>2</sub> O                   | 0.1           | nicotinic acid            | 5.0           |
|                                                      |               | CoCl <sub>2</sub> ·6H <sub>2</sub> O                   | 0.1           | Pantothenic acid          | 5.0           |
|                                                      |               | ZnSO <sub>4</sub>                                      | 0.1           | Vitamin B12               | 0.1           |
|                                                      |               | CuSO <sub>4</sub> ·5H <sub>2</sub> O                   | 0.01          | paminobenzoic acid        | 5.0           |
|                                                      |               | AlK(SO <sub>4</sub> ) <sub>2</sub> ·12H <sub>2</sub> O | 0.01          | thioctic acid             | 5.0           |
|                                                      |               | H <sub>3</sub> BO <sub>3</sub>                         | 0.01          |                           |               |
|                                                      |               | Na <sub>2</sub> MoO <sub>4</sub> ·2H <sub>2</sub> O    | 0.01          |                           |               |
|                                                      |               | NiCl <sub>2</sub> ·6H <sub>2</sub> O                   | 0.024         |                           |               |
|                                                      |               | NaWO <sub>4</sub> ·2H <sub>2</sub> O                   | 0.025         |                           |               |

**Table S2** Chemical composition of the samples and N1s components (values given in % of total amount N) based on XPS measurements

| Samples    | at.% (C) | at.% (O) | at.% (N) | Pyridinic N (%) | Pyrrolic N (%) | Graphitic N (%) | Oxidized N (%) |
|------------|----------|----------|----------|-----------------|----------------|-----------------|----------------|
| EPGC-700-2 | 85.35    | 8.82     | 5.83     | 43.73           | 38.67          | 6.93            | 10.67          |
| EPGC-800-1 | 85.96    | 9.62     | 4.43     | 46.10           | 35.13          | 9.42            | 9.35           |
| EPGC-800-2 | 86.37    | 10.01    | 3.62     | 67.40           | 20.88          | 7.89            | 3.83           |
| EPGC-800-3 | 89.82    | 7.52     | 2.66     | 58.91           | 30.63          | 4.68            | 5.78           |
| EPGC-900-2 | 90.55    | 7.63     | 1.82     | 62.94           | 25.74          | 8.32            | 3.00           |

**Table S3** Comparison of the structure and performance of EPGC-800-2 and other carbon-based ORR catalysts

| Catalysts                             | Specific surface area (m <sup>2</sup> /g) | $I_D/I_G$ | Onset potential (V vs Ag/AgCl) | half-wave potential (V vs Ag/AgCl) | $n$       | Ref.       |
|---------------------------------------|-------------------------------------------|-----------|--------------------------------|------------------------------------|-----------|------------|
| EPGC-800-2                            | 1137                                      | 0.76      | 0.153                          | -0.022                             | 3.90      | This study |
| NC/Fe <sub>8</sub> Co <sub>2</sub>    | 561.02                                    |           | -0.02                          | -0.12                              | 3.87-3.93 | [1]        |
| PR-C (1:3.5)                          | 416.7                                     | 1.27      | 0.087                          | -0.048                             | 3.2       | [2]        |
| CE-Fe-MWNT                            | 680                                       | 1.05      | -0.007                         | -0.133                             | 3.83      | [3]        |
| PAC-800                               | 1273.8                                    | 1.05      | 0.03                           | -0.13                              | 3.72-3.96 | [4]        |
| e-BAC                                 | 114                                       | 2.26      | -0.200                         | -0.3                               |           | [5]        |
| Fe <sub>3</sub> O <sub>4</sub> @N-mC  | 26.73                                     | 1.24      |                                | -0.257                             | 3.76      | [6]        |
| NC-3                                  | 609.1                                     | 1.13      | 0.132                          | -0.041                             | 3.34-3.71 | [7]        |
| TGC-900                               | 651.78                                    | 1.04      | -0.027                         | -0.154                             | 3.48-3.84 | [8]        |
| Mn-Fe@g-C <sub>3</sub> N <sub>4</sub> | 268.6                                     | 1.14      | 0.197                          | -0.174                             | 3.94      | [9]        |
| ZIF-8                                 | 1416                                      |           | 0.11                           | -0.32                              | 3.83      | [10]       |
| CP-M-Z                                | 636.99                                    | 2.64      | 0.16                           | -0.128                             | 3.87-3.93 | [11]       |
| CN800                                 | 143                                       |           | 0.215                          | -0.096                             | 3.1       | [12]       |
| HC-900                                | 908.9                                     | 1.29      | -0.015                         | -0.129                             | 3.65-3.93 | [13]       |

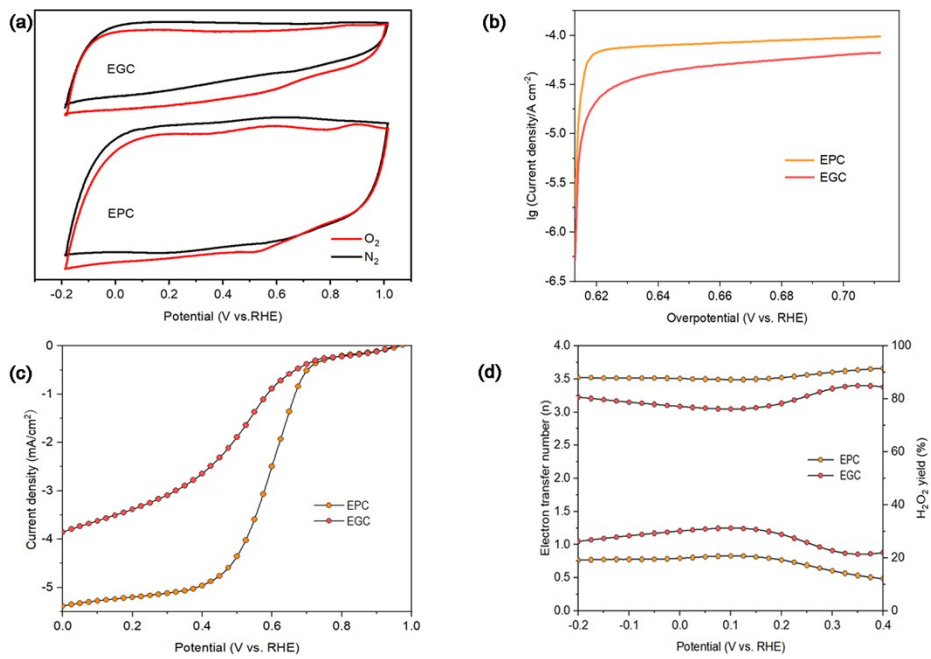

**Fig. S1** (a) CV curves in  $\text{N}_2$ - and  $\text{O}_2$ -saturated 50 mM PBS solutions at 5 mV/s, (b) Tafel plots, (c) LSV curves in  $\text{O}_2$ -saturated 50 mM PBS with 1600 rpm at 5 mV/s, (d) electron transfer numbers ( $n$ ) and  $\text{H}_2\text{O}_2$  yield of EPC and EGC.

## Reference

- [1] C. Han, X. Bo, J. Liu, M. Li, M. Zhou, L. Guo, Fe, Co bimetal activated N-doped graphitic carbon layers as noble metal-free electrocatalysts for high-performance oxygen reduction reaction, *J. Alloys Compd.* 710 (2017) 57–65.
- [2] W. Wang, S. Liu, Y. Liu, W. Jing, R. Zhao, Z. Lei, Phenolic resin/chitosan composite derived nitrogen-doped carbon as highly durable and anti-poisoning electrocatalyst for oxygen reduction reaction, *Int. J. Hydrogen Energy.* 42 (2017) 26704–26712.
- [3] J. Zhang, S. Wu, X. Chen, M. Pan, S. Mu, Egg derived nitrogen-self-doped carbon/carbon nanotube hybrids as noble-metal-free catalysts for oxygen reduction, *J. Power Sources.* 271 (2014) 522–529.
- [4] P. Fu, L. Zhou, L. Sun, B. Huang, Y. Yuan, Nitrogen-doped porous activated carbon derived from cocoon silk as a highly efficient metal-free electrocatalyst for the oxygen reduction reaction, *RSC Adv.* 7 (2017) 13383–13389.
- [5] S. Marzorati, A. Goglio, S. Fest-Santini, D. Mombelli, F. Villa, P. Cristiani, A. Schievano, Air-breathing bio-cathodes based on electro-active biochar from pyrolysis of Giant Cane stalks, *Int. J. Hydrogen Energy.* 44 (2019) 4496–4507.
- [6] H. Zhou, Y. Yang, S. You, B. Liu, N. Ren, D. Xing, Oxygen reduction reaction activity and the microbial community in response to magnetite coordinating nitrogen-doped carbon catalysts in bioelectrochemical systems, *Biosens. Bioelectron.* 122 (2018) 113–120.
- [7] B, Jianting Liu A , et al. "A novel hard-template method for fabricating tofu-gel based N self-doped porous carbon as stable and cost-efficient electrocatalyst in microbial fuel cell." *International Journal of Hydrogen Energy* 44.48(2019):26477-26488.
- [8] Liu J , Wei L , Wang H , et al. Biomass-derived N-doped porous activated carbon as a high-performance and cost-effective pH-universal oxygen reduction catalyst in fuel cell[J]. *International Journal of Hydrogen Energy*, 2020.
- [9] A, Kengqiang Zhong , et al. "Highly conductive skeleton Graphitic-C 3 N 4 assisted Fe-based metal-organic frameworks derived porous bimetallic carbon nanofiber for enhanced oxygen-reduction performance in microbial fuel cells." *Journal of Power Sources* 467.
- [10] Xue W , Zhou Q , Li F , et al. Zeolitic imidazolate framework-8 (ZIF-8) as robust catalyst for oxygen reduction reaction in microbial fuel cells[J]. *Journal of Power Sources*, 2019, 423(MAY 31):9-17.
- [11] Yang, W., Dong, Y., Li, J., Fu, Q., Zhang, L., 2020. Templating synthesis of hierarchically meso/macroporous N-doped microalgae derived biocarbon as oxygen reduction reaction catalyst for microbial fuel cells. *Int. J. Hydrogen Energy*.
- [12] Wang X , Yuan C , Shao C , et al. Enhancing oxygen reduction reaction by using metal-free nitrogen-doped carbon black as cathode catalysts in microbial fuel cells

treating wastewater[J]. Environmental Research, 182.

[13] Wenyuan, Jiahuan, Tang, et al. Hierarchically structured carbon materials derived from lotus leaves as efficient electrocatalyst for microbial energy harvesting.[J]. The ence of the total environment, 2019, 666:865-874.
